# Supplementary material
Source: PubMed Central journal article supplement (PMC6638212)
Supplement: MPP-18-347-s003.pdf [file MPP-18-347-s003.pdf]

## Supplemental Table 1. Primers used in this study

| Primer       | Sequence (5'- 3')                 | Remarks                              |
|--------------|-----------------------------------|--------------------------------------|
| MLBF         | GGATTTTGGTTTTAGGAATTAGA           | <i>MspI</i> left border, forward     |
| MLBR         | AATTCGGCGTTAATTCAGTACA            | <i>MspI</i> left border, reverse     |
| MLSeq        | TCAGTACATTA AAAACGTCCGCAA         | <i>MspI</i> left border, sequencing  |
| MRBF         | CAACTGTTGGGAAGGGCGATC             | <i>MspI</i> right border, forward    |
| MRBR         | CAGCCTGAATGGCGAATGCTA             | <i>MspI</i> right border, reverse    |
| MRSSeq       | GAATGCTAGAGCAGCTTGAGCT            | <i>MspI</i> right border, sequencing |
| NLBF         | AGTGATTGACCGATTCCTTGC             | <i>NcoI</i> left border, forward     |
| NLBR         | AGGGTTCCTATAGGGTTTCGCTCATG        | <i>NcoI</i> left border, reverse     |
| NLSeq        | GAATTAATTCGGCGTTAATTCAGT          | <i>NcoI</i> left border, sequencing  |
| NRBF         | CGTTATGTTTATCGGCACTTGTG           | <i>NcoI</i> right border, forward    |
| NRBR         | GGCACTGGCCGTCGTTTTACAAC           | <i>NcoI</i> right border, reverse    |
| NRSSeq       | CCCTTCCCAACAGTTGCGCA              | <i>NcoI</i> right border, sequencing |
| KO-6010-LF   | GGTCTTAAUACTGCGCTGATGACCTCAC      | Left border, forward                 |
| KO-6010-LR   | GGCATTAAUCAGTGGATGCTGTTGTCGAT     | Left border, reverse                 |
| KO-6010-RF   | GGACTTAAUAATGCGAAATGCGTAAGGAG     | Right border, forward                |
| KO-6010-RR   | GGGTTAAUGCGGTAGGCCTTCTTGATCT      | Right border, reverse                |
| 6010-F       | GCGGCCGCATGTCAGTTACGAACGGTGC      | Full length, forward                 |
| 6010-R       | CCATGGTCAATTAACACCAGCAGCCTT       | Full length, reverse                 |
| 6010 -comp_F | GAATTCTGCGCTGATGACCTCACC          | Complementation, forward             |
| 6010 -comp_R | TTAATTAACCGCCTTGGATCACCAC         | Complementation, reverse             |
| qPCR-6010-F  | ACACGATCCTCCAG ATCTC              | Real-time PCR, forward               |
| qPCR-6010-R  | GCGAGAAGTCTTCCAGGTG               | Real-time PCR, reverse               |
| VdELF1-a-F   | CCATTGATATCGCACTGTGG              | Real-time PCR, forward               |
| VdELF1-a-F   | TGGAGATACCAGCCTCGAAC              | Real-time PCR, reverse               |
| qPCR-Hyg-F   | ATAGGTCAGGCTCTCGCTGA              | Real-time PCR, forward               |
| qPCR-Hyg-R   | GATGTAGGAGGGCGTGGATA              | Real-time PCR, reverse               |
| 6010-BamH1-F | GGATCCTCAGTTACGAACGGTGCCA         | pET-SUMO cloning, forward            |
| 6010-Hind3-R | AAGCTTCTATTATCAATTAACACCAGCAGCCTT | pET-SUMO cloning, reverse            |
